# Supplementary material
Source: PubMed Central journal article supplement (PMC4424410)
Supplement: supp_O114.044792_mcp.O114.044792-10.pdf [file supp_O114.044792_mcp.O114.044792-10.pdf]

## **Supplement**

### **System-wide analysis of SUMOylation dynamics in response to replication stress reveals novel SUMO target proteins and acceptor lysines relevant for genome stability**

#### **Authors**

Zhenyu Xiao<sup>1</sup>, Jer-Gung Chang<sup>1</sup>, Ivo A. Hendriks<sup>1</sup>, Jón Otti Sigurðsson<sup>2</sup>, Jesper V. Olsen<sup>2</sup> and Alfred C.O. Vertegaal<sup>1\*</sup>

#### **Affiliation**

<sup>1</sup>Department of Molecular Cell Biology, Leiden University Medical Center, 2300 RC Leiden, the Netherlands

<sup>2</sup>Novo Nordisk Foundation Center for Protein Research, Faculty of Health and Medical Sciences, University of Copenhagen, Blegdamsvej 3B, 2200 Copenhagen, Denmark

\* To whom correspondence should be addressed: E-mail: [vertegaal@lumc.nl](mailto:vertegaal@lumc.nl)

#### **Running title**

SUMOylation and replication stress

## **Legends Supplemental Figures**

### **Figure S1. A strategy for identifying SUMO-2 acceptor lysines in endogenous proteins during replication stress.**

*A*, Schematic representation of the His10-SUMO-2-K0-Q87R-IRES-GFP construct used in this project.

*B*, Cartoon depicting our strategy to identify SUMO-2 acceptor lysines and their dynamics during replication stress. U2OS cells expressing His10-SUMO-2-K0-Q87R were treated with 2 mM Hydroxyurea (HU) for 2 hours or 24 hours to induce DNA replication fork stalling and double strand breaks, respectively. U2OS cells expressing His10-SUMO-2-K0-Q87R cells were mock treated as negative controls. SUMO-2 target proteins were enriched on Ni-NTA beads. SUMOylated peptides were obtained by Lys-C digestion and Ni-NTA re-purification and subsequently analyzed by mass spectrometry.

### **Figure S2. A U2OS cell line stably expressing His10-SUMO-2-K0-Q87R.**

Immunoblotting analysis was used to verify the expression levels of SUMO-2 in U2OS cells stably expressing His10-SUMO-2-K0-Q87R (His10-K0-S2-Q87R).

## Legends Supplemental Tables

**Supplemental Table 1. SUMO-2 target proteins.** A complete list of 566 His10-SUMO-2 target proteins including gene names, intensities, PEP, ANOVA  $\log(P$  value) and other relevant information.

**Supplemental Table 2. Bioinformatics analysis of SUMOylated proteins.** Complete term enrichment analysis of all SUMOylated proteins identified in our site-independent approach. Annotated terms include GOBP, GOMF, GOCC, CORUM, Keywords, KEGG, Pfam and GSEA.

**Supplemental Table 3. Fully annotated list of all SUMOylated proteins.**

**Supplemental Table 4. HU-regulated SUMO-2 target proteins.** Label-free quantification of SUMOylated proteins with significantly regulated proteins after 2 hours or 24 hours of HU treatment. The proteins are sorted by their average  $\log_2$  LFQ ratio for 2 hours HU treatment compared to control, and for 24 hours HU treatment compared to control.

**Supplemental Table 5. SUMOylation sites.** A list of SUMO-2 acceptor lysines obtained by our site-specific purification approach, including gene names, intensities, sequence windows, overlap with Hendriks *et al.*(39) and other relevant information.

**Supplemental Table 6. SUMO-2 targets identified in a site-specific manner.** A complete list of all proteins identified by SUMOylation site, with number of sites, gene names, site positions and other relevant information.

**Supplemental Table 7. HU-regulated SUMOylation sites.** Sites quantification with significantly regulated sites after 2 hours or 24 hours of HU treatment compared to the control. The SUMOylation sites are sorted by average  $\log_2$  ratio for 2h HU treatment compared to control, and for 24h HU treatment compared to control.

**Supplemental Table 8. Overlap of dynamic SUMO-2 target proteins identified in our site-independent and our site-specific approach.** A comparison of dynamically regulated SUMO-2 target proteins identified, using the SUMOylation site-independent approach or the SUMOylation site-specific approach. Overlap, and other relevant information are provided.

**Supplemental Table 9. Peptides co-modified by SUMOylation and phosphorylation.** List of peptides simultaneously modified by both SUMO-2 and phosphorylation.

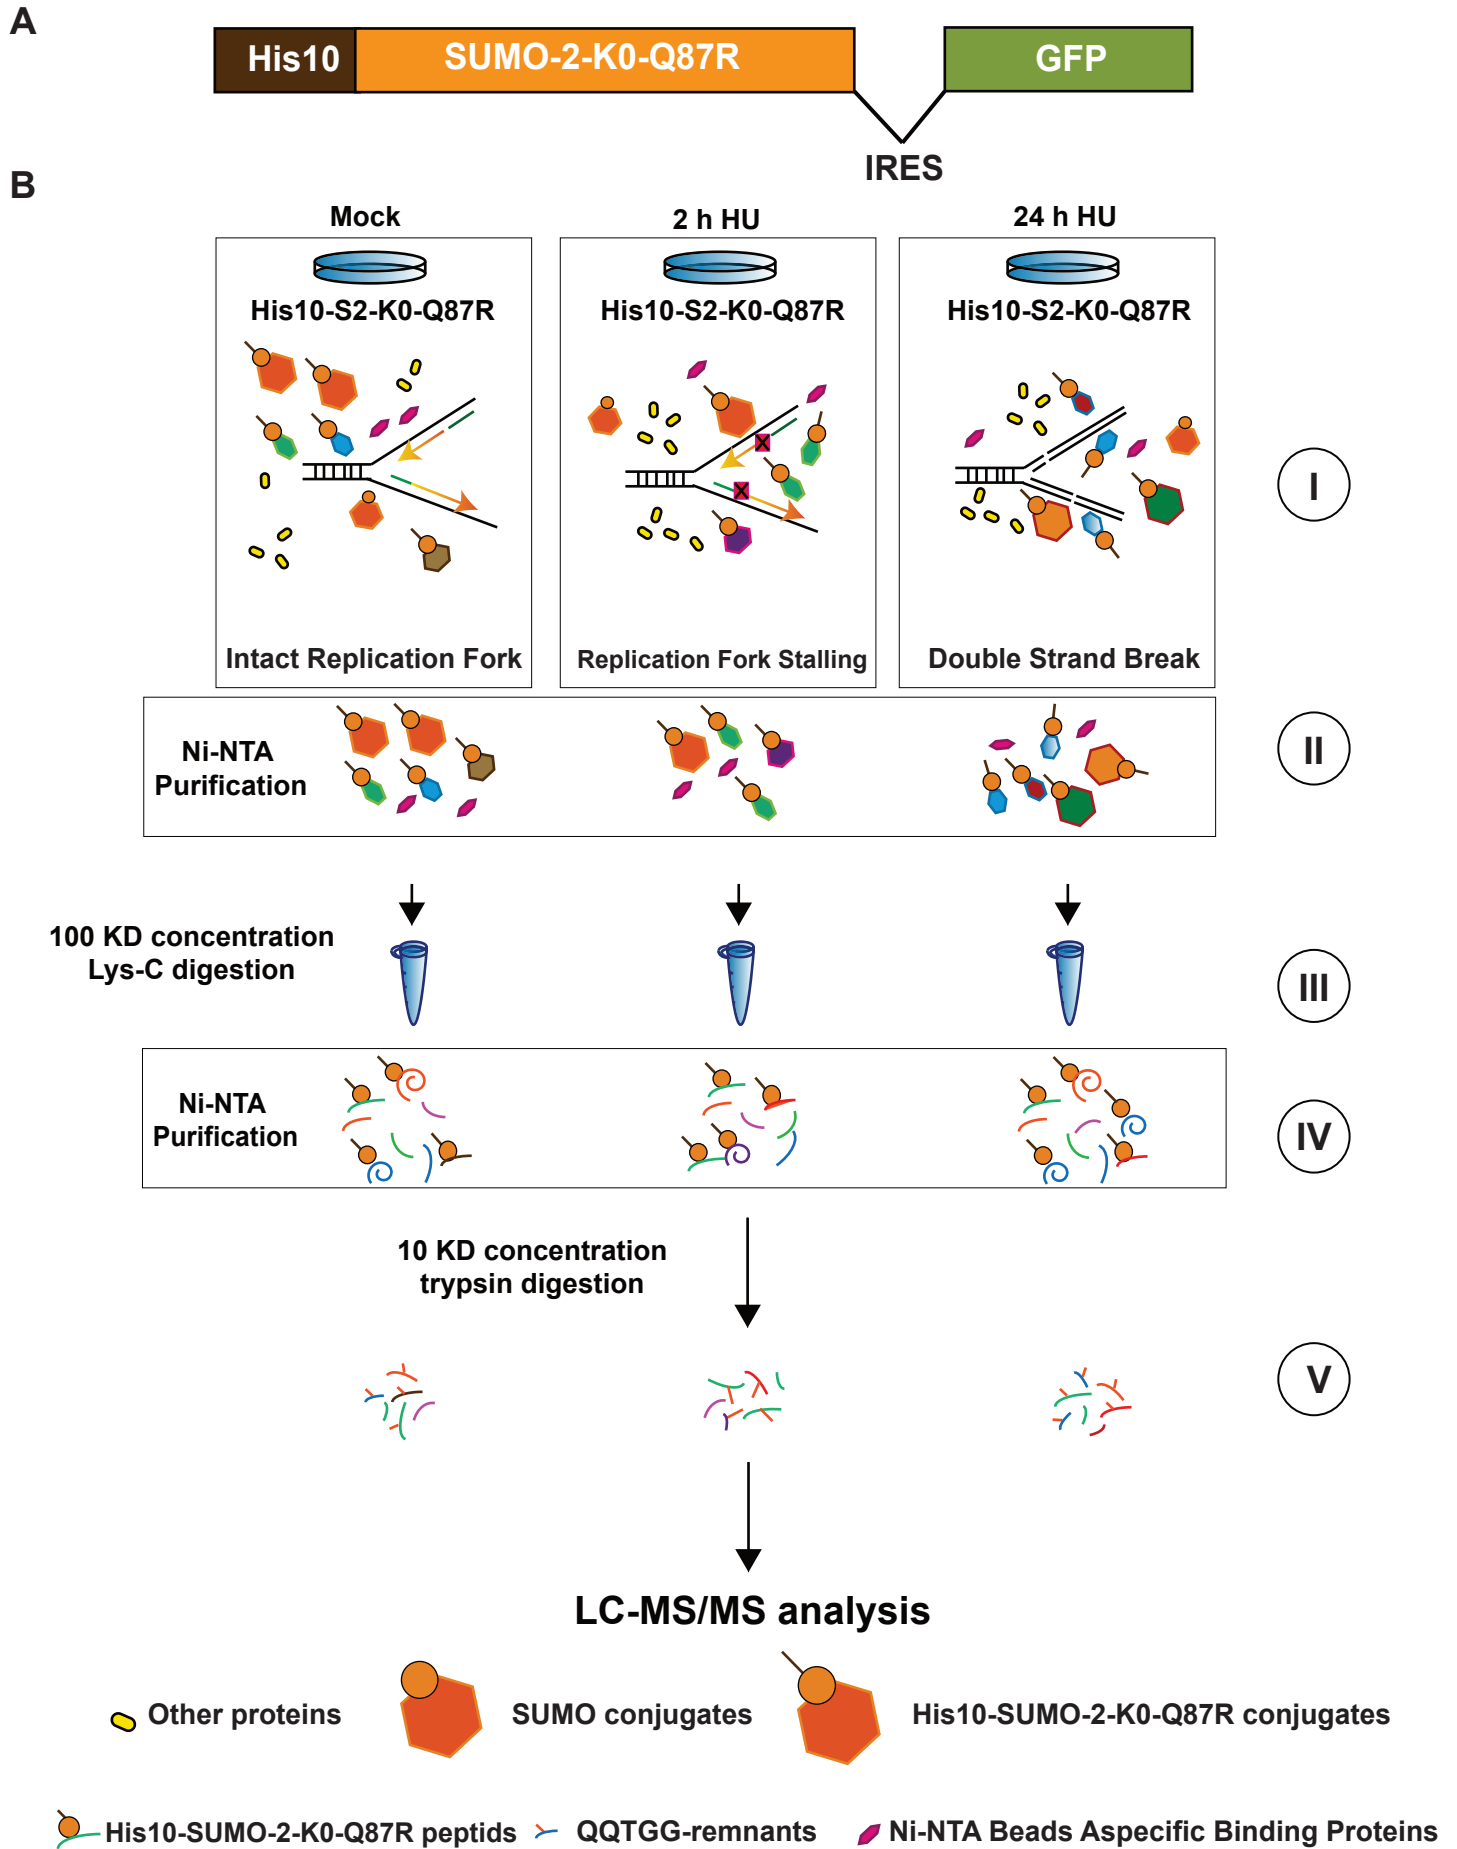

**Figure S1**

**A**

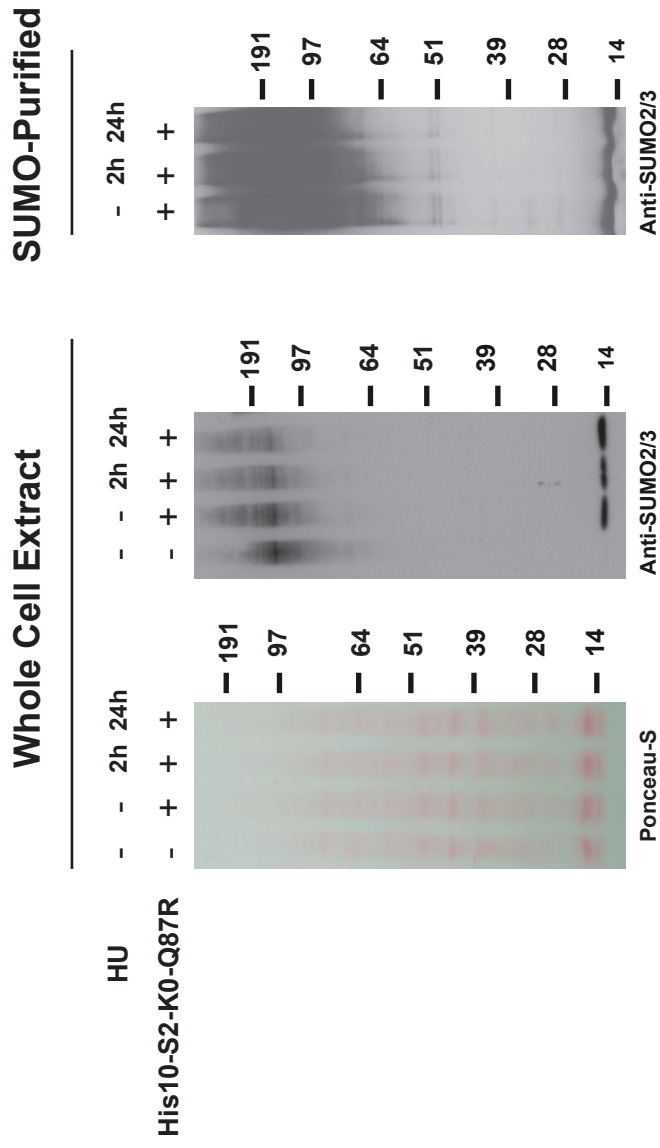

**Figure S2**
